1 **Genetically predicted levels of the human plasma proteome and risk of stroke: a Mendelian**

2 **Randomization study**

3

4 Lingyan Chen<sup>1+</sup>, James E. Peters<sup>2</sup>, Bram Prins<sup>1</sup>, Elodie Persyn<sup>1,3</sup>, Matthew Traylor<sup>4+</sup>, Praveen  
5 Surendran<sup>1,5</sup>, Savita Karthikeyan<sup>1</sup>, Ekaterina Yonova-Doing<sup>1+</sup>, Emanuele Di Angelantonio<sup>1,6,7,8</sup>, David  
6 J. Roberts<sup>7,9,10</sup>, Nicholas A. Watkins<sup>11</sup>, Willem H. Ouwehand<sup>6,11,12,13</sup>, John Danesh<sup>1,6,7,8,14</sup>, Cathryn M.  
7 Lewis<sup>3,15</sup>, Paola G. Bronson<sup>16</sup>, Hugh S. Markus<sup>17</sup>, Stephen Burgess<sup>1,6,18</sup>, Adam S. Butterworth<sup>1,6,7,8</sup>,  
8 Joanna M. M. Howson<sup>1\*+</sup>.

9 1. British Heart Foundation Cardiovascular Epidemiology Unit, Department of Public Health and  
10 Primary Care, University of Cambridge, Cambridge, UK

11 2. Department of Immunology and Inflammation, Faculty of Medicine, Imperial College London,  
12 London, UK

13 3. Department of Medical & Molecular Genetics, King's College London, London, UK

14 4. Clinical Pharmacology, William Harvey Research Institute, Queen Mary University of London,  
15 London, UK

16 5. Rutherford Fund Fellow, Department of Public Health and Primary Care, University of Cambridge,  
17 UK

18 6. British Heart Foundation Centre of Research Excellence, University of Cambridge, Cambridge, UK

19 7. National Institute for Health Research Blood and Transplant Research Unit in Donor Health and  
20 Genomics, University of Cambridge, Cambridge, UK

21 8. Health Data Research UK Cambridge, Wellcome Genome Campus and University of Cambridge,  
22 Cambridge, UK

23 9. NHS Blood and Transplant-Oxford Centre, Level 2, John Radcliffe Hospital, Oxford, UK

24 10. Radcliffe Department of Medicine, University of Oxford, John Radcliffe Hospital, Oxford, UK

25 11. NHS Blood and Transplant, Cambridge Biomedical Campus, Long Road, Cambridge, UK

26 12. Department of Haematology, University of Cambridge, Cambridge, UK

27 13. Wellcome Sanger Institute, Hinxton, UK

28 14. Department of Human Genetics, Wellcome Sanger Institute, Hinxton, UK

29 15. Social, Genetic and Developmental Psychiatry Centre, King's College London, London, UK

30 16. R&D Translational Biology, Biogen, Inc., Cambridge, MA, USA

31 17. Department of Clinical Neurosciences, University of Cambridge, Cambridge, UK

32 18. Medical Research Council Biostatistics Unit, Cambridge Institute of Public Health, University of

33 Cambridge, Cambridge, UK

34 \*Correspondence to: Joanna M. M. Howson [jmmh2@medschl.cam.ac.uk](mailto:jmmh2@medschl.cam.ac.uk)

35 † Current address: Novo Nordisk Research Centre Oxford, Innovation Building, Old Road Campus,

36 Roosevelt Drive, Oxford, UK.

37

38 **Abstract**

39 Proteins are the effector molecules of biology and are the target of most drugs. To identify proteins  
40 and related pathways that may play a causal role in stroke pathogenesis, we used Mendelian  
41 randomisation (MR). We tested potential causal effects of 308 plasma proteins (measured in 4,994  
42 blood donors from the INTERVAL study) on stroke outcomes (derived from the MEGASTROKE  
43 GWAS) in a two-sample MR framework and assessed whether these associations could be mediated  
44 by cardiovascular risk factors. We extended the analysis to identify whether pharmacological  
45 targeting of these proteins might have potential adverse side-effects or beneficial effects for other  
46 conditions through Phenome-wide MR (Phe-MR) in UK Biobank.

47 MR showed an association between stroke and genetically predicted plasma levels of TFPI, IL6RA,  
48 MMP12, CD40, TMPRSS5 and CD6 ( $P \leq 1.62 \times 10^{-4}$ ). We identified six risk factors (atrial fibrillation,  
49 body mass index, smoking, blood pressure, white matter hyperintensities and type 2 diabetes) that  
50 were associated with stroke ( $P \leq 0.0071$ ) using MR. The association of TFPI, IL6RA and TMPRSS5  
51 with stroke could be mediated by these risk factors, such as body mass index, white matter  
52 hyperintensity and atrial fibrillation. Thirty-six additional proteins were potentially causal for one or  
53 more of these risk factors. The Phe-MR suggested that targeting TFPI could have potential beneficial  
54 effects on other disorders of arteries and hyperlipidaemia in addition to stroke. Our results highlight  
55 novel causal pathways and potential therapeutic targets for stroke.

56

57 **Key Words**

58 Mendelian Randomization; genetics; proteomics; stroke; cardiovascular disease; drug target;  
59 Phenome-wide MR (PheMR)

60

61

## 62 **Introduction**

63 Stroke is the second leading cause of death worldwide, estimated to cause ~5.5 million deaths  
64 annually and is the leading cause of long-term disability, with a growing burden on global health <sup>1</sup>.  
65 Therefore, there is a need for new and improved treatments and prevention strategies for stroke. While  
66 conventional risk factors, such as hypertension <sup>2</sup>, account for ~50% of stroke risk, there remains a  
67 need to identify new risk factors, biomarkers and therapies for stroke<sup>3</sup>. In 2017, ~75% of FDA-  
68 approved drugs were targeted at human proteins<sup>4</sup>. Plasma proteins play a central role in a range of  
69 biological processes frequently dysregulated in diseases <sup>5-8</sup>, and represent a major source of  
70 therapeutic targets for many indications <sup>4,9,10</sup>. In particular, plasma proteins are particularly relevant  
71 for circulatory diseases such as stroke as they are in physical contact with the blood vessels  
72 (compared to tissue-specific diseases, *e.g.* inflammatory bowel disease).

73 Genome-wide association studies (GWAS) of plasma protein levels have identified genetic variants  
74 that are associated with proteins, usually referred to as ‘protein quantitative trait loci (pQTLs)’ <sup>11-13</sup>,  
75 offering an opportunity to test the causal effect of potential drug targets on the human disease  
76 phenome using Mendelian randomization (MR) <sup>14,15</sup>. Briefly, MR can be thought of as nature’s  
77 randomized trial, by capitalising on the random allocation of genetic variants at conception to separate  
78 individuals into subgroups (one equivalent to placebo and the other to intervention in a randomized  
79 control trial, RCT) and so allows testing of the potential causal association of risk factors (*e.g.* plasma  
80 proteins) with disease outcomes (*e.g.* stroke) as confounders should also be randomised.

81 Here, we perform a two-sample MR to estimate the causal effects of plasma proteins on stroke, where  
82 we derived genetic instrumental variables of 308 circulating plasma proteins from 4,994 participants  
83 <sup>16</sup> and obtained genetic associations of stroke subtypes, (any stroke (AS), any ischemic stroke (IS),  
84 large-artery-stroke (LAS), cardio-embolic-stroke (CES) and small-vessel-stroke (SVS)) from the  
85 MEGASTROKE GWAS <sup>17</sup>. Then, to verify the robustness of the proteins’ instrumental variables, we  
86 perform colocalization analyses. We evaluate the causal relationship of plasma proteins on stroke  
87 risk factors and assess potential safety effects of targeting the proteins for stroke therapy by  
88 performing a phenome-wide MR in UK Biobank GWASs <sup>18</sup>.

89

## 90 **Methods**

91 The overall study design is illustrated in **Figure 1**. Details of the methods and study participants are  
92 provided below.

93

### 94 **Proteomic profiling and quality control**

95 A subset of 4,994 blood donors at mean age of 61 years (SD 6.7 years) enrolled in the INTERVAL  
96 BioResource<sup>16</sup>, were processed for proteomic profiling using the Olink Proseek® Multiplex platform  
97 by 4 high-throughput, multiplex immunoassays: Inflammatory I (INF1), Cardiovascular II (CVD2),  
98 Cardiovascular III (CVD3) and Neurology I (NEURO) (Olink Bioscience, Uppsala, Sweden). Each  
99 panel enables the simultaneous measurement of 92 proteins through relative quantification using the  
100 Proximity Extension Assay (PEA) Technology<sup>19</sup>, in which each pair of oligonucleotide-labelled  
101 antibodies (“probes”) are allowed to bind to their respective target present in the sample and trigger  
102 extension by DNA polymerase. DNA barcodes unique to each protein are then amplified and  
103 quantified using a standard real-time polymerase chain reaction (PCR). Default pre-processing of  
104 the proteomic data by Olink included applying median centring normalization between plates, where  
105 the median is centred to the overall median for all plates, followed by log<sub>2</sub> transformation to provide  
106 normalised protein expression (NPX) values. Further details on the Olink proteomic data processing  
107 can be found at <http://www.olink.com>. Probes were labelled using Uniprot identifiers, which we re-  
108 mapped to HUGO gene name nomenclature for the (cis-) gene encoding the relevant protein. All  
109 protein names and descriptions are provided in **Supplementary Table 1**.

110 Samples that failed standard Olink quality control metrics were removed. 4,902, 4,947, 4,987, and  
111 4,660 samples passed quality control for the ‘INF1’, ‘CVD2’, ‘CVD3’ and ‘NEURO’ panels,  
112 respectively. According to the manufacturer's recommendation, we also removed four proteins  
113 (HAGH, BDNF, GDNF and CSF3) in the ‘NEURO’ panel and one protein (GDNF) in the ‘INF1’  
114 panel due to high levels of missingness.

115

## 116 **Proteome GWAS**

117 The INTERVAL study<sup>16</sup> was genotyped using the UK Biobank Affymetrix Axiom array  
118 (<http://www.ukbiobank.ac.uk/scientists-3/uk-biobank-axiom-array/>), and imputed to 1000 Genomes  
119 Phase 3-UK10K combined reference panel, employing the PBWT imputation algorithm<sup>20</sup>. Genetic  
120 data for the ~5000 participants with Olink proteomic profiling were extracted to test for association of  
121 the genetic variants with plasma proteins. More details regarding the INTERVAL genetic data QC  
122 can be found here<sup>21</sup>. Within the ~5,000 participant subset, we removed six related individuals (those  
123 individuals with pairwise values of twice the kinship coefficient ( $PI\_HAT$ )  $> 0.1875$  (removing the  
124 individuals with the lowest call rate from each pair). The final imputed dataset was additionally  
125 filtered for imputation quality (only retaining variants with an info score  $> 0.4$ ) and Hardy-Weinberg  
126 equilibrium (retaining variants with  $P_{HWE} > 1 \times 10^{-4}$ ).

127 354 proteins (of 363) that passed quality control were taken forward for the GWAS. Normalized  
128 protein levels ('NPX') were regressed on sex, age, plate, time from blood draw to processing (in  
129 days), season (as a categorical variable: 'Spring', 'Summer', 'Autumn', 'Winter'), and batch when  
130 appropriate. The residuals were then rank-inverse normalized. Linear regression of the rank-inversed  
131 normalized residuals on genotype was carried out in SNPTEST v.2.5.2<sup>22</sup>, with the first three  
132 components of multi-dimensional scaling as covariates to adjust for ancestry. Only proteins with at  
133 least one SNP with an association  $P$ -value passing the genome-wide significant threshold ( $P \leq 5.0 \times 10^{-8}$ )  
134 were kept, resulting in 308 proteins for MR analyses.

135

## 136 **Genetic variants associated with proteins**

137 For each plasma protein, cis- and trans- pQTLs from its corresponding GWAS were used as genetic  
138 instruments. We followed these steps to select pQTL instruments: (i) we obtained SNPs that were  
139 also tested in the MEGASTROKE GWAS of stroke outcomes (see below), (ii) we performed linkage  
140 disequilibrium (LD) clumping using PLINK 1.90 ([www.cog-genomics.org/plink/1.9/](http://www.cog-genomics.org/plink/1.9/))<sup>23</sup> to obtain

141 approximately independent SNPs for each protein. In brief, the LD clumping algorithm groups SNPs  
142 in LD ( $r^2 \geq 0.1$  in 4,994 European ancestry participants from the INTERVAL study<sup>16,21</sup>) within +/-  
143 1MB of an index SNP (SNPs with association  $P \leq 5 \times 10^{-8}$ ). Analyses assessing sensitivity to the  $r^2 \geq$   
144 0.1 LD threshold are detailed below. The algorithm loops through all index SNPs, beginning with the  
145 smallest  $P$ -value and only allowing each SNP to appear in one clump. The final output therefore  
146 contains the most significant protein-associated SNPs for each LD-based clump across the genome.  
147 We split pQTL variants into cis-pQTLs (+/-1MB window of the gene encoding the target protein) and  
148 trans-pQTLs (outside the +/-1MB window). We then performed MR in a two-step approach. Our  
149 primary analysis was restricted to cis-pQTLs. Having performed MR restricted to cis-pQTL only as  
150 IVs, we broadened the analysis to consider the effects of adding in trans-pQTLs as IVs. We estimated  
151 the variance of each protein explained by its IVs through calculating the  $R^2$ <sup>24</sup> and the strength of each  
152 IV by the  $F$ -statistic<sup>25</sup>. Summary association statistics of all the instrumental variables (IVs) for the  
153 15 significant proteins are provided in **Supplementary Table 2**.

154 To assess the robustness of the  $r^2 \geq 0.1$  threshold for IV selection, we performed two additional  
155 sensitivity analyses (**Supplementary Table 11**) for proteins of interest to verify the robustness of  
156 MR causal relationship: 1) we performed conditional analysis to derive conditionally independent  
157 variants as IVs using the FINEMAP software package<sup>26</sup> with `--cond` flag; 2) we performed fine-  
158 mapping to obtain variants in the 95% credible set as IVs using FINEMAP software package<sup>26</sup> with -  
159 `--sss` flag.

## 160 161 **Genetic variants associated with stroke and its risk factors**

162 The primary outcomes were the risk of stroke and its subtypes. Genetic association estimates for  
163 stroke outcomes were obtained from the MEGASTROKE consortium, a large-scale international  
164 collaboration launched by the International Stroke Genetics Consortium (ISGC). A detailed  
165 description of the study design and characteristics of study participants were provided in the original  
166 publication<sup>17</sup>. To reduce confounding by population stratification, we extracted estimates for the  
167 associations of the protein IVs with stroke and its subtypes restricted to individuals of European

168 ancestry (40,585 cases and 406,111 controls). The primary outcomes for this study were any stroke  
169 (including both ischemic and haemorrhagic stroke; AS,  $N_{\text{cases}} = 40,585$ ), any ischemic stroke (IS,  
170  $N_{\text{cases}} = 34,217$ ), and the three etiologic ischemic stroke subtypes: large-artery stroke (LAS,  $N_{\text{cases}} =$   
171  $4,373$ ), cardio-embolic stroke (CES,  $N_{\text{cases}} = 7,193$ ) and small-vessel stroke (SVS,  $N_{\text{cases}} = 5,386$ ).  
172 Summary-level data (beta coefficients and standard errors) for the associations of the five stroke  
173 outcomes were obtained from the MEGASTROKE GWAS <http://www.megastroke.org/index.html>.  
174 The secondary outcomes we considered were stroke risk factors, including blood pressure (BP) <sup>27</sup>,  
175 atrial fibrillation (AF) <sup>28</sup>, type 2 diabetes (T2D) <sup>29</sup>, white matter hyperintensity (WMH) <sup>30</sup>, body mass  
176 index (BMI) <sup>31</sup>, alcohol consumption and smoking behaviour <sup>32</sup>. We used the same pQTLs as IVs for  
177 the secondary outcomes as for the primary outcomes. The SNP-outcome effects for all the above risk  
178 factors were obtained from previously published GWASs when available. **Table 1** provides full  
179 details of the data sources and sample size for these GWASs.

180

### 181 **Phenome-wide MR (Phe-MR) analysis of 784 phenotypes for target proteins**

182 We expanded the exploration of side-effects for the six stroke-associated proteins to include non-  
183 stroke phenotypes by performing Phe-MR analyses for a range of diseases. We used summary  
184 statistics for SNP-outcome effects calculated using the UK Biobank cohort ( $N \leq 408,961$ ) by Zhou et  
185 al. <sup>33</sup>, who performed GWAS using the Scalable and Accurate Implementation of GEneralized mixed  
186 model (SAIGE v.0.29) method <sup>33</sup> to account for unbalanced case-control ratios. They defined disease  
187 outcomes based on “PheCodes”, a system developed to organize International Classification of  
188 Diseases and Related Health Problems (ICD-9/-10) codes into phenotypic outcomes suitable for  
189 systematic genetic analysis of numerous disease traits <sup>18,33</sup>. Outcomes with fewer than 500 cases were  
190 excluded due to statistical power, leaving 784 diseases for Phe-MR analyses (**Supplementary Table**  
191 **8**). SNP-outcome associations were downloaded from SAIGE GWAS <sup>33</sup>  
192 (<https://www.leelabsg.org/resources>). pQTLs were derived from the same proteome GWAS as in the  
193 primary analysis with stroke subtypes.



194 Phe-MR findings can be interpreted as the risk/protective effect per-SD increase in the plasma protein  
195 level, same as with primary stroke outcomes. That is, if the effect direction of the additional  
196 indication is consistent with the effect direction in Stroke, the identified protein that is therapeutically  
197 targeted for the treatment of stroke may also be “beneficial” for the additional indication, and vice  
198 versa. MR causal effects are considered statistically significant at  $P \leq 1.06 \times 10^{-5}$  (Bonferroni-adjusted  
199 for 6 proteins and 784 phenotypes:  $0.05/6/784$ ).

200

### 201 **Systematic MR screening for causal proteins of stroke and stroke risk factors**

202 We used two-sample MR<sup>34-36</sup> to estimate the associations between genetically-predicted protein  
203 levels and target outcomes (stroke, stroke risk factors, and potential adverse effects or additional  
204 indications). Two sample MR<sup>37</sup> is where the genetic associations with the risk factor are derived in  
205 one cohort (*e.g.* pQTLs from INTERVAL) and the association of these genetic variants with the  
206 outcome is tested in a second cohort (*e.g.* stroke GWAS from MEGASTROKE). Two-sample MR  
207 allows evaluation of causal effects using summary genetic association data, negating the need for  
208 individual participant data. The MR approach was based on the following assumptions: (i) the genetic  
209 variants used as instrumental variable (IV) are associated with target exposure, *i.e.*, protein levels; (ii)  
210 there are no unmeasured confounders of the associations between genetic variants and outcome; (iii)  
211 the genetic variants are associated with the outcome only through changes in the exposure, *i.e.*, no  
212 pleiotropy.

213 After extracting the association estimates between the variants and the exposures or the outcomes, we  
214 harmonized the direction of estimates by effect alleles, and applied the Wald’s ratio method to  
215 estimate the causal effects when there was only one IV available for target exposure. If more than one  
216 IV was available, we applied the inverse-variance weighting (IVW) method, either in a fixed-effect  
217 framework ( $IVs \leq 3$ ) or in a multiplicative random-effect meta-analysis framework ( $IVs > 3$ )<sup>34</sup>. We  
218 chose 3 as a cut-off for the random effects model, as with  $>3$  variants, there is potential for some  
219 heterogeneity within instrumental variables. (The multiplicative random-effects model allows for  
220 heterogeneity between causal estimates targeted by the genetic variants by allowing over-dispersion

221 the regression model.) We also performed several sensitivity analyses to assess the robustness of our  
222 results to potential violations of the MR assumptions given these analyses have different assumptions  
223 for validity: (i) heterogeneity was estimated by Cochran  $Q$  test<sup>34</sup>; (ii) horizontal pleiotropy was  
224 estimated using MR-Egger's intercept<sup>38</sup>; (iii) influential outlier IVs due to pleiotropy were identified  
225 using MR Pleiotropy Residual Sum and Outlier (MR-PRESSO)<sup>39</sup>; (iv) reverse MR was used to  
226 eliminate spurious results due to reverse causation. Additionally, the contamination mixture method  
227<sup>40</sup>, which can explicitly model multiple potential causal estimates and therefore infer multiple causal  
228 mechanisms associated with the same risk factor that affect the outcome to different degrees, was also  
229 used to calculate the MR estimates. Although these methods may have differing assumptions and  
230 statistical power, the rationale for using them is that if they give a similar conclusion, this provides  
231 greater certainty in inferring that any positive results are unlikely to be driven by violation of the MR  
232 assumptions.

233 Effects on binary outcomes (*i.e.*, stroke, AF, T2D, smoking initiation/cessation) are reported as odds  
234 ratios (ORs) with their 95% confidence intervals (CIs) scaled to a one standard deviation (SD) higher  
235 plasma protein level. Effects on quantitative outcomes (*i.e.*, BP, WMH, BMI) are reported as the  
236 effect size (95% CI) scaled to a 1-SD higher plasma protein levels. All statistical tests were two-sided  
237 and considered statistically significant at  $P_{CausalEstimate} \leq 1.62 \times 10^{-4}$  (Bonferroni-adjusted for 308  
238 proteins:  $0.05/308 = 1.62 \times 10^{-4}$ ),  $P_{Q-stat} \geq 0.05$ ,  $P_{Egger-Intercept} \geq 0.05$  and  $P_{GlobalTest} \geq 0.05$ . The MR  
239 analyses were conducted using *MendelianRandomization* (Version: 0.4.2)<sup>35</sup>, *TwoSampleMR*  
240 (Version: 0.4.22)<sup>36</sup> and *MR-PRESSO* (Version: 1.0)<sup>39</sup> packages in R 3.5.1 (R Foundation, [www.R-](http://www.R-project.org)  
241 [project.org](http://www.R-project.org)). Plots were generated using various R packages including *ggplot2* (Version: 3.2.0),  
242 *forestplot* (Version: 1.9), and *PheWAS* (Version: 0.99.5-4). We employed the same statistical analysis  
243 framework, incorporating the sensitivity analyses for all MR analyses.

244

#### 245 **Multi-trait colocalization analyses**

246 As the instruments used in the current setting were identified based on their statistical associations  
247 with the protein level, we conducted another sensitivity analysis – colocalization, to investigate

248 whether the genetic associations with both protein and phenotypes shared the same causal variants.  
249 We conducted colocalization analysis for each potential causal protein across multiple traits, including  
250 protein level and five stroke outcomes, to estimate the posterior probability (PP) of multiple traits  
251 sharing the same causal SNP simultaneously using a multi-trait colocalization (HyPrColoc) method<sup>41</sup>.  
252 HyPrColoc extends the established coloc methodology<sup>42</sup> by approximating the true posterior  
253 probability of colocalization with the posterior probability of colocalization at a single causal variant  
254 and a small number of related hypotheses. If all traits do not share a causal variant, HyPrColoc  
255 employs a novel branch-and-bound selection algorithm to identify subsets of traits that colocalize at  
256 distinct causal variants at the locus. We used uniform priors for the primary analysis. We also  
257 performed sensitivity analysis with non-uniform priors to assess the choice of priors, which used a  
258 conservative trait-level prior structure with  $P=1 \times 10^{-4}$  (prior probability of a SNP being associated  
259 with one trait) and  $\gamma=0.98$  (1-prior probability of a SNP being associated with an additional trait given  
260 that the SNP is associated with at least one other trait), *i.e.*, 1 in 500,000 variants are expected to be  
261 causal for two traits.

262 Variants within a  $\pm 1\text{Mb}$  window around the pQTL with the smallest  $P$ -value, with imputation  
263 (INFO)-score  $\geq 0.8$  and minor allele frequency (MAF)  $\geq 0.01$  were included. All variants across each  
264 of the datasets were harmonized to the same effect alleles prior to colocalization analyses. We  
265 conducted the colocalization analysis using the ‘HyPrColoc’ R package<sup>41</sup>.

## 266 Results

### 267 Genetically determined plasma protein levels and risk of stroke

268 Three hundred and eight plasma proteins were tested for causal associations with stroke outcomes  
269 (**Figure 1**). As cis-pQTLs were considered to have a more direct and specific biological effect upon  
270 the protein (compared to trans-pQTLs)<sup>43</sup>, we first performed MR analyses using only cis-pQTLs as  
271 instrumental variables and identified six putatively causal proteins with at least one stroke outcome ( $P$   
272  $\leq 1.62 \times 10^{-4} = 0.05/308$  proteins; **Table 2, Figure 2 & Figure 3, Supplementary Figure 1**): TFPI  
273 (Tissue Factor Pathway Inhibitor), TMPRSS5 (Transmembrane Serine Protease 5), CD40 (B Cell  
274 Surface Antigen CD40), MMP12 (Matrix Metalloproteinase 12), IL6RA (Interleukin 6 Receptor), and  
275 CD6 (T-Cell Differentiation Antigen CD6). TFPI, CD40, IL6RA, and MMP12 were significantly  
276 associated with lower risk of any stroke and any ischemic stroke, while TMPRSS5 and CD6 was  
277 significantly associated with higher risk of any stroke. Among the ischemic stroke subtypes, genetic  
278 predisposition to upregulated TMPRSS5 was associated with higher risk of any ischemic stroke (OR  
279 per-1-SD higher plasma protein level [95%CI]=1.059[1.038, 1.08];  $P=1.36 \times 10^{-8}$ ) and Cardioembolic  
280 stroke (OR[95%CI]=1.089[1.045, 1.134];  $P=5.33 \times 10^{-5}$ ). Higher genetically predicted levels of both  
281 MMP12 (OR[95%CI]=0.793[0.73, 0.861];  $P=3.53 \times 10^{-8}$ ) and CD40 (OR[95% CI]= 0.795[0.723,  
282 0.874];  $P=2.09 \times 10^{-6}$ ) were associated with lower risk of Large-artery stroke. Higher genetically  
283 predicted soluble IL6RA (and lower IL6R signalling<sup>44</sup>) was associated with lower risk of Small-  
284 vessel stroke (OR[95% CI]= 0.939[0.909, 0.970];  $P=1.60 \times 10^{-4}$ ).

285 We extended the MR analyses to include trans-pQTLs as instrumental variables and identified nine  
286 additional proteins significantly associated with at least one stroke outcome ( $P \leq 1.62 \times 10^{-4}$ ;  
287 **Supplementary Table 3**). However, seven proteins (VSIG2, EPHB4, Gal4, ICAM2, LIFR, SELE, and  
288 vWF), included instrumental variables from the *ABO* locus, which is well known to have pleiotropic  
289 effects. We note that the ABO protein has previously been identified as a genetic risk factor for  
290 stroke<sup>45</sup>. Interestingly, both Bone Morphogenetic Protein 6 (BMP6) and Growth Differentiation  
291 Factor 2 (GDF2, also known as BMP9) were instrumented by *trans*-pQTLs located in the genetic  
292 regions of *KNG1* (Kininogen 1) and *F11* (Coagulation Factor XI). Both genes are essential for blood

293 coagulation and the latter has previously been reported to be a causal risk factor for stroke<sup>46</sup>. GDF2  
294 has also been found to have a causal role in pulmonary artery hypertension (PAH)<sup>47</sup>. We therefore  
295 focused further analyses on the proteins with *cis* pQTL only (*i.e.*, TFPI, TMPRSS5, CD40, MMP12,  
296 IL6RA, CD6), as these associations with stroke are unlikely to be due to pleiotropy.  
297 Results of sensitivity analyses confirmed the robustness of the primary MR analyses. There was no  
298 evidence for heterogeneity in the association of any of the six proteins in **Supplementary Table 3** as  
299 measured by Cochran Q statistics ( $P_{Q-stat} > 0.05$ ), and no indication that the instrumental variables had  
300 horizontal pleiotropy as assessed by MR-Egger intercept ( $P_{Egger-Intercept} > 0.05$ ) or MR-PRESSO global  
301 pleiotropy test ( $P_{GlobalTest} > 0.05$ ). All MR causal effect estimates adjusting for correlation of IVs'  
302 were consistent with the primary analyses (**Supplementary Table 10**). Moreover, MR causal  
303 estimates using IVs derived from conditionally independent variants and credible sets of variants from  
304 fine-mapping showed consistent results (**Supplementary Table 11 & 12**). There was no evidence of  
305 reverse causations (**Supplementary Table 13**).

306

### 307 **Co-localization**

308 We formally tested whether the associations of the variant with the protein levels used as IVs and the  
309 stroke outcome are shared for the six proteins using statistical colocalization analysis. We applied a  
310 Bayesian algorithm, Hypothesis Prioritization in multi-trait Colocalization (HyPrColoc), which allows  
311 for the assessment of colocalization across multiple complex traits simultaneously (**Methods**), to test  
312 whether the protein associations and stroke associations are shared. The association of the genetic  
313 variants selected as instrumental variables for four proteins (TFPI, TMPRSS5, CD40, and CD6)  
314 colocalized with the stroke associations (posterior probability (PP)  $\geq 0.7$ ) (**Supplementary Table 4**,  
315 **Supplementary Figure 2**) *i.e.*, the associations in these regions were likely due to the same  
316 underlying causal variants. The colocalization suggested the genetic variants associated with TFPI  
317 (pQTLs) were due to the same genetic variants underlying the association with all-stroke. Similarly,  
318 CD6 pQTLs colocalized with all-stroke genetic associations; CD40 pQTLs colocalized with the  
319 genetic associations for all-stroke, ischemic-stroke and large-artery-stroke; TMPRSS5 pQTLs

320 colocalized with all-stroke, ischemic-stroke and cardioembolic-stroke genetic associations. Notably,  
321 we found for TFPI, CD40, and CD6 that >80% of the posterior probability of colocalization of the  
322 primary genetic association with stroke and the respective protein levels were explained by a single  
323 variant (rs67492154, rs4810485, and rs2074227 for TFPI, CD40, and CD6, respectively). The  
324 colocalization evidence at MMP12, was less strong than with the other proteins, with colocalization  
325 PP>0.6 and there was no colocalization evidence for IL6RA with stroke, which could be due to  
326 violation of the single causal variant assumption of the HyprColoc method.

327

### 328 **Characterizing the potential causal effects of stroke risk factors on stroke**

329 To understand potential causal mechanisms between plasma proteins and stroke, we conducted  
330 mediation MR analyses for conventional stroke risk factors. First, we performed two-sample MR  
331 analyses to characterize the causal relationship of the stroke risk factors with all stroke outcomes.  
332 Second, we assessed the causal effects of the proteins on the highlighted risk factors.

333 For each of the six stroke risk factors we considered (*i.e.*, blood pressure (BP), atrial fibrillation (AF),  
334 type 2 diabetes (T2D), white matter hyper-intensity (WMH), body mass index (BMI), smoking  
335 behaviours and alcohol consumption), instrumental variables were derived from published GWAS  
336 summary statistics restricted to European populations (**Table 1 & Supplementary Table 5**). AF,  
337 T2D, smoking, increased systolic BP, diastolic BP, pulse pressure, WMH, and BMI significantly  
338 increased the risk of any stroke ( $P \leq 0.05/7 = 0.007$ , Bonferroni adjusted for seven risk factors; **Figure**  
339 **4, Supplementary Table 6 & Supplementary Figure 3**). As expected, systolic BP exhibited the  
340 strongest effect of all the risk factors on any ischemic stroke and LAS (OR per-1-SD [95%  
341 CI]=1.68[1.57, 1.80] and 2.58[2.21, 3.01], respectively) and AF had a positive association with CES  
342 (OR[95% CI]: 2.04[1.92, 2.16];  $P = 2.72 \times 10^{-125}$ ). WMH increased risk of any stroke and SVS (1-SD  
343 increased in WMH was associated with 49% higher odds for SVS (OR[95% CI]=1.49[1.17, 1.9];  
344  $P = 0.00147$ ). Both genetically determined higher T2D risk and smoking initiation were associated  
345 with increased risk of LAS and SVS; and genetically determined higher BMI was associated with

346 higher risk of LAS. No significant association was observed for alcohol consumption with any of the  
347 stroke outcomes ( $P>0.05$ ).

348

#### 349 **Associations of genetically determined plasma protein levels with stroke risk factors**

350 We performed MR of all 308 plasma proteins with the highlighted stroke risk factors (excluding  
351 alcohol consumption which was not associated with increased stroke risk in the above MR analyses).  
352 After multiple testing correction, 39 proteins instrumented with cis-pQTLs were significantly  
353 associated with at least one stroke risk factor ( $P \leq 1.62 \times 10^{-4}$ ): 5 with Systolic BP; 7 with Diastolic BP;  
354 7 with Pulse Pressure; 6 with AF; 4 with T2D; 9 with BMI; 3 with WMH; and 8 with smoking. There  
355 was no evidence of horizontal pleiotropy, and sensitivity analyses yielded consistent causal effect  
356 estimates (**Supplementary Table 14**).

357 Among the six stroke-associated proteins, three proteins were found to be significantly associated  
358 with one or more of the stroke risk factors (**Figure 5; Table 3; Supplementary Figure 4**). Of note,  
359 we found genetically predicted higher TFPI level was associated with lower WMH and lower BMI (a  
360 0.06 SD lower WMH  $\beta$ [95% CI]= -0.06[-0.08, -0.04];  $P=7.15 \times 10^{-10}$  and a 0.013 SD lower BMI  
361  $\beta$ [95% CI]= -0.013[-0.019, -0.007];  $P=3.56 \times 10^{-5}$  per-SD higher TFPI; **Supplementary Table 7**). We  
362 thus inferred that the association between TFPI and stroke could be partially mediated by BMI and  
363 WMH. Genetically determined higher TMPRSS5 levels were associated with higher risk of AF  
364 (OR[95% CI]: 1.03[1.016, 1.045];  $P=2.15 \times 10^{-5}$ ). Together with the causal relationship of AF and  
365 cardioembolic stroke, we can also infer that AF is a possible mediator on the effect of TMPRSS5 on  
366 cardioembolic stroke. Genetically higher IL6RA levels were associated with a 4.1% lower risk of AF  
367 (OR[95% CI]: 0.96[0.95, 0.97];  $P=2.55 \times 10^{-18}$ ). All the effect directions of these associations of  
368 proteins with risk factors were consistent with those of the proteins with stroke, indicating that these  
369 risk factors may be potential mediators of the protein-stroke associations.

370 Among the 39 proteins that were associated with at least one stroke risk factor, 36 were found to be  
371 associated with the risk factors but not stroke outcome (**Supplementary Table 14**). For example,

372 genetically determined Fibroblast Growth Factor 5 (FGF5) level was associated with higher risk of  
373 AF (OR=1.056 per SD higher FGF5); each SD higher genetically determined Glypican 5 (GPC5) was  
374 associated with higher risk of T2D (OR=1.02); each SD higher in genetically determined Scavenger  
375 Receptor Class F Member 2 (SCARF2) was associated with a 0.062-SD higher WMH. We found that  
376 higher genetically determined Alpha-L-Iduronidase (IDUA) and Sialic Acid-Binding Ig-Like Lectin 9  
377 (SIGLEC9) were both associated with lower BMI. Higher genetically determined Serine Protease 27  
378 (PRSS27) was associated with higher SBP, higher DBP and higher PP, while higher genetically  
379 determined levels of Neurocan (NCAN) were associated with lower risk of T2D (OR=0.76) and 0.07-  
380 SD lower SBP.

381

### 382 **Phenome-wide MR (Phe-MR) analysis of stroke-associated proteins in UK Biobank**

383 To assess whether the six stroke-associated proteins have either beneficial or deleterious effects for  
384 other indications, we performed a broader MR screen of 784 diseases and traits in UK Biobank  
385 (**Supplementary Table 8**). Our Phe-MR results can be interpreted as a per-SD increase in genetically  
386 determined plasma protein level that leads to an higher or lower odds of a given disease or trait. If the  
387 effect direction of the protein on the disease or trait is the same as on stroke, the effect is considered  
388 “beneficial” and “deleterious” otherwise. Overall, 34 significant associations were identified ( $P \leq$   
389  $0.05/6/784 = 1.06 \times 10^{-5}$ ), of which 21 (61.7%) were in the same direction as the stroke association  
390 (**Supplementary Table 9**).

391 Notably, genetically higher levels of plasma TFPI were not only associated with lower risk of stroke,  
392 but also lower risk of other diseases involving the circulatory system (cerebrovascular disease, other  
393 disorders of arteries), metabolic traits (hyperlipidemia and hypercholesterolemia, disorders of lipid  
394 metabolism) and digestive system disorders (acute gastritis); however, they were also associated with  
395 higher risk of excessive or frequent menstruation (**Figure 6 & Supplementary Figure 5**).

396 Genetically higher levels of plasma Tmprss5 were associated with higher risk of cardioembolic  
397 stroke, as well as protein-calorie malnutrition (metabolic trait) (**Figure 6 & Supplementary Figure**  
398 **5**). All the significant associations for CD40, including haemoptysis and abnormal sputum



399 (respiratory system) were consistent with the effect direction of that with stroke. Effects of IL6RA on  
400 risk of diseases on circulatory system disorders (ischemic heart disease, cardiac dysrhythmias, atrial  
401 fibrillation and flutter, coronary atherosclerosis, angina pectoris, abdominal aortic aneurysm) and  
402 musculoskeletal disease (other inflammatory spondylopathies) were consistent with that on risk of  
403 stroke; but had inverse effects on dermatologic symptoms (*e.g.* cellulitis and abscess of arm/foot),  
404 digestive system (*e.g.* cholelithiasis) and chronic renal failure [CKD] (**Supplementary Figure 6 &**  
405 **Supplementary Table 9**). Genetically predicted CD6 was associated with alcoholic liver damage  
406 and degeneration of intervertebral disc (musculoskeletal system) but in the inverse direction to stroke.  
407 Summary results of the primary and sensitivity MR analyses for all the 784 phenotypes are provided  
408 in **Supplementary Table 9**.

409

410

## 411 Discussion

412 Based on genetic data for 308 proteins involved in cardiovascular disease, inflammation and  
413 neurological processes from ~5000 individuals<sup>16</sup>, our study provides robust evidence that six proteins  
414 (TFPI, TMPRSS5, CD40, MMP12, IL6RA, and CD6) are causally associated with stroke. We  
415 showed that AF, systolic and diastolic BP, BMI, T2D, WMH and smoking were causally associated  
416 with risk of any stroke (and some ischemic stroke subtypes), demonstrating a key role of the risk  
417 factors in the pathogenesis of stroke consistent with classical epidemiological data<sup>48-56</sup>. We found the  
418 associations of TFPI, IL6RA, and TMPRSS5 with stroke were likely to be mediated by one or more  
419 of these risk factors. In addition, we showed that 36 additional proteins were causal for these risk  
420 factors. Finally, the Phe-MR highlighted additional beneficial indications of therapeutically targeting  
421 the six stroke-associated proteins and importantly, indicated few potential safety concerns. Although,  
422 as many of the phenotypes tested are not independent, the definition of significance used here might  
423 be too conservative (Bonferroni-corrected  $P$ -value adjusted for the number of proteins tested (six) and  
424 the total number of phenotypes (784) ( $P=0.05/6/784=1.06\times 10^{-5}$ ).

425 Tissue factor pathway inhibitor (TFPI) is primarily secreted by endothelial cells and is an  
426 anticoagulant that acts on the clotting cascade<sup>57</sup>. Observational studies showed that lower levels of  
427 free TFPI were associated with higher risk of ischemic stroke<sup>58</sup> and higher risk of first and recurrent  
428 venous thrombosis<sup>59</sup>, while inhibition of TFPI showed to be an effective treatment of bleeding  
429 associated with hemophilia<sup>60</sup>. Consistent with this, we provided genetic evidence for directionally  
430 consistent effects of TFPI on multiple ischemic traits, such as ischemic stroke and ischemic heart  
431 disease, and opposite effects on haemorrhagic traits (*e.g.*, gastrointestinal haemorrhage,  $P=5.23\times 10^{-5}$ ;  
432 excessive or frequent menstruation in females,  $P=2.70\times 10^{-10}$ ). We also showed that higher levels of  
433 TFPI were associated with lower BMI and WMH (**Figure 5**), and lower risk of hyperlipidemia,  
434 specifically hypercholesterolemia (**Figure 6**), suggesting that the pathways through which TFPI  
435 influences stroke risk might go beyond anticoagulation, *e.g.*, inflammation or atherosclerotic changes.  
436 Animal studies<sup>60,61</sup> provide supporting evidence that TFPI has a role in attenuating arterial thrombus  
437 formation and atherosclerosis development. Future studies of TFPI in cardiovascular diseases

438 focusing on the role of TFPI activity and different TFPI isoforms in the development of atherogenesis  
439 could provide further insights.

440 TMPRSS5 (Transmembrane Protease Serine 5, also known as Spinesin) is a member of the Type II  
441 Transmembrane Serine Protease Family (TTSPs)<sup>62</sup>. For example, TMPRSS10 (Corin), one member  
442 of the TTSPs, has been reported to be involved in cardiac conduction and myometrial relaxation and  
443 contraction pathways in regulating blood pressure and promoting natriuresis, diuresis and vasodilation  
444<sup>63</sup>. Unlike Corin, the function of TMPRSS5 on cardiovascular systems is poorly understood. Human  
445 *TMPRSS5* mRNA has been shown to be expressed in the brain and the protein is predominantly  
446 expressed in neurons, in their axons in the spinal cord<sup>64</sup>. A mouse model with mutant TMPRSS5 had  
447 reduced proteolytic activity and suggested a role in hearing loss<sup>65</sup>. We were unable to find other  
448 studies that implicate TMPRSS5 in cardiovascular disease, both for any ischemic stroke and  
449 cardioembolic stroke, an effect that might be mediated by risk of atrial fibrillation (**Figure 4**).  
450 Furthermore, Phe-MR analysis revealed suggestive additional beneficial effects when targeted at  
451 TMPRSS5, *e.g.*, reduced risk of Parkinson's disease ( $P=2.15\times 10^{-5}$ ) and left bundle branch block  
452 ( $P=1.43\times 10^{-5}$ ). Taken together, TMPRSS5 represents a potentially promising therapeutic target for  
453 atrial fibrillation and cardioembolic stroke, and further research is warranted to decipher the  
454 mechanism through which it protects against cardiovascular and neurological diseases.

455 In addition, we have identified CD6, a lymphocyte surface receptor, associated with increased risk of  
456 any stroke. CD6 is a pan T cell marker<sup>66,67</sup>, and involved in T cell proliferation and activation  
457 through its interaction with ALCAM (activated leukocyte cell adhesion molecule)<sup>68</sup>. The interaction  
458 of CD6 and ALCAM is required to promote an inflammatory T cell response<sup>69</sup>. Interestingly,  
459 Smedbakken L *et al*<sup>70</sup> found that acute ischemic stroke patients with upregulated ALCAM at  
460 admission had a significantly poorer survival rate ( $P<0.001$ ). Given this interaction and that the  
461 recruitment of leukocytes and platelets is widely regarded as a pivotal step in the inflammatory  
462 response associated with cerebral ischemia<sup>71,72</sup>, together with our finding that CD6 is associated  
463 with stroke, further investigation of CD6 in the context of stroke is justified.

464 Our study not only identified potentially novel targets (*i.e.* TFPI, TMPRSS5 and CD6) for stroke, but  
465 also validated proteins that had been identified as causally associated with cardiovascular diseases in  
466 previous proteome MR studies <sup>11,46,73</sup>, *e.g.* CD40, MMP12 and IL6RA. Genetic variants in the *IL6R*  
467 region are associated with risk of inflammatory related diseases <sup>44</sup>, including coronary heart disease <sup>74</sup>,  
468 stroke <sup>73</sup>, atrial fibrillation <sup>75</sup> and rheumatoid arthritis <sup>76</sup>. Moreover, IL6R is the target of an FDA-  
469 approved therapy (Tocilizumab) for the treatment of several diseases, *e.g.*, rheumatoid arthritis and  
470 systemic juvenile idiopathic arthritis. Phase II clinical trials testing tocilizumab for the therapy of  
471 Non-ST Elevation Myocardial Infarction have reported promising results <sup>77</sup> and a phase III clinical  
472 trial testing Ziltivekimab in cardiovascular disease and chronic kidney disease has recently started  
473 (NCT05021835).

474 To avoid violating the MR assumptions, we performed various sensitivity analyses. We used LD  
475 clumping at  $R^2$  0.1 for pQTLs with  $P5.0 \times 10^{-8}$  to choose instruments for each of plasma protein level.  
476 However, concern <sup>78</sup> has been raised about the independency of the variants used as instrumental  
477 variables leading to violation of the InSIDE (instrument strength independent of direct effect)  
478 assumption of the MR-Egger method used. Therefore, we performed several sensitivity analyses to  
479 validate the robustness of the instrumental variables used in the MR analysis. Firstly, we performed  
480 MR analyses adjusting for the correlation of the variants used and obtained consistent and similar  
481 causal effect estimates to those obtained without adjusting for the correlation (**Supplementary Table**  
482 **10**). Secondly, we performed conditional analysis and fine-mapping analysis to obtain instrumental  
483 variables for the six potential causal proteins and we obtained consistent MR results (**Supplementary**  
484 **Table 12 & Supplementary Figure 7**). Finally, colocalization analyses across the genetic  
485 associations with protein levels and stroke outcomes showed they were likely to have shared causal  
486 variants across these traits, supporting the validity of instrumental variables and the causal protein  
487 associations (**Supplementary Table 4**).

488 The Olink assay<sup>19</sup> used in our study measures the bulk concentration of protein in plasma. However,  
489 because this assay cannot distinguish free from bound protein or active from inactive, only limited  
490 mechanistic insights can be made. Due to the limited capture of human proteome (1.5% of all known

491 proteins), we could not evaluate the effects of all proteins within the same family or all proteins  
492 encoded within the same genomic region. For instance, we found that TMPRSS5 was a potential  
493 novel drug target for cardioembolic stroke, while other proteins in the Type II Transmembrane Serine  
494 Protease Family (TTSPs) that play crucial roles in cardiac functions<sup>62,79</sup> could not be evaluated.  
495 Thus, a targeted study of the TTSP family is warranted to comprehensively evaluate their effects in  
496 cardiovascular and neurological traits.

497 Our results highlight potential targets of future therapies for stroke outcomes and illustrates the  
498 relevance of proteomics in identifying drug targets. Further research is necessary to assess the  
499 viability of the six identified proteins as drug targets for stroke treatment. Additional drug targets  
500 may be uncovered as more comprehensive proteomics platforms become available and more diverse  
501 non-European ancestry populations are increasingly studied. Finally, there is an increasing need for  
502 similarly comprehensive proteomics across different tissues and organs to evaluate tissue- or organ-  
503 specific protein effects.

504

505 **Funding**

506 This work and LC were funded by a program grant from the British Heart Foundation  
507 (RG/16/4/32218). PS is supported by a Rutherford Fund Fellowship from the Medical Research  
508 Council (MR/S003746/1). BP and SK are funded by a British Heart Foundation Programme grant  
509 (RG/18/13/33946). EY-D was funded by the Isaac Newton Trust / Wellcome Trust ISSF / University  
510 of Cambridge Joint Research Grants Scheme. SB is supported by a Sir Henry Dale Fellowship jointly  
511 funded by the Wellcome Trust and the Royal Society (204623/Z/16/Z). JMMH was funded by the  
512 NIHR Cambridge Biomedical Research Centre (BRC-1215-20014) [\*]. CML is funded by the NIHR  
513 Biomedical Research Centre at South London and Maudsley NHS Foundation Trust and King's  
514 College London. HSM is supported by a NIHR Senior Investigator award, and his work is supported  
515 by the Cambridge Universities NIHR Comprehensive Biomedical Research Centre. JD holds a  
516 British Heart Foundation Professorship and a NIHR Senior Investigator Award [\*].

517 \*The views expressed are those of the author(s) and not necessarily those of the NIHR or the  
518 Department of Health and Social Care.

519

520

521 **Acknowledgements**

522 Participants in the INTERVAL randomised controlled trial were recruited with the active  
523 collaboration of NHS Blood and Transplant England ([www.nhsbt.nhs.uk](http://www.nhsbt.nhs.uk)), which has supported field  
524 work and other elements of the trial. DNA extraction and genotyping were co-funded by the National  
525 Institute for Health Research (NIHR), the NIHR BioResource (<http://bioresource.nihr.ac.uk>) and the  
526 NIHR Cambridge Biomedical Research Centre (BRC-1215-20014) [\*]. The Olink® Proteomics  
527 assays were funded by Biogen, Inc. (Cambridge, MA, US). The academic coordinating centre for  
528 INTERVAL was supported by core funding from the: NIHR Blood and Transplant Research Unit in  
529 Donor Health and Genomics (NIHR BTRU-2014-10024), UK Medical Research Council  
530 (MR/L003120/1), British Heart Foundation (SP/09/002; RG/13/13/30194; RG/18/13/33946) and  
531 NIHR Cambridge BRC (BRC-1215-20014) [\*] and funding from the EC-Innovative Medicines

532 Initiative (BigData@Heart). A complete list of the investigators and contributors to the INTERVAL  
533 trial is provided in reference [\*\*]. The academic coordinating centre would like to thank blood donor  
534 centre staff and blood donors for participating in the INTERVAL trial.

535 This work was supported by Health Data Research UK, which is funded by the UK Medical Research  
536 Council, Engineering and Physical Sciences Research Council, Economic and Social Research  
537 Council, Department of Health and Social Care (England), Chief Scientist Office of the Scottish  
538 Government Health and Social Care Directorates, Health and Social Care Research and Development  
539 Division (Welsh Government), Public Health Agency (Northern Ireland), British Heart Foundation  
540 and Wellcome.

541 \*The views expressed are those of the author(s) and not necessarily those of the NIHR or the  
542 Department of Health and Social Care.

543 \*\*Di Angelantonio E, Thompson SG, Kaptoge SK, Moore C, Walker M, Armitage J, Ouweland WH,  
544 Roberts DJ, Danesh J, INTERVAL Trial Group. Efficiency and safety of varying the frequency of  
545 whole blood donation (INTERVAL): a randomised trial of 45 000 donors. *Lancet*. 2017 Nov  
546 25;390(10110):2360-2371.

547

#### 548 **Author contributions**

549 L.C. performed the analyses and wrote the initial draft of the manuscript. J.M.M.H. designed and  
550 supervised the project. J.E.P, B.P, E.P provided data and analytical support. All authors contributed  
551 to the data preparation and critically reviewed the manuscript.

552

553

#### 554 **Competing interests**

555 JMMH, LC, MT and EY-D became full time employees of Novo Nordisk Ltd during the drafting of  
556 this manuscript. JD reports grants, personal fees and non-financial support from Merck Sharp &  
557 Dohme (MSD), grants, personal fees and non-financial support from Novartis, grants from Pfizer and  
558 grants from AstraZeneca outside the submitted work. JD sits on the International Cardiovascular and

559 Metabolic Advisory Board for Novartis (since 2010); the Steering Committee of UK Biobank (since  
560 2011); the MRC International Advisory Group (ING) member, London (since 2013); the MRC High  
561 Throughput Science ‘Omics Panel Member, London (since 2013); the Scientific Advisory Committee  
562 for Sanofi (since 2013); the International Cardiovascular and Metabolism Research and Development  
563 Portfolio Committee for Novartis; and the Astra Zeneca Genomics Advisory Board (2018). ASB  
564 reports institutional grants from AstraZeneca, Bayer, Biogen, BioMarin, Bioverativ, Merck, Novartis  
565 and Sanofi and personal fees from Novartis. PB is a full-time employee of Biogen Inc. CML sits on  
566 the Scientific Advisory Board for Myriad Neuroscience.  
567



## 568 References

- 569 1. Feigin, V.L. *et al.* Global, regional, and national burden of neurological disorders,  
570 1990–2016: a systematic analysis for the Global Burden of Disease Study 2016. *The*  
571 *Lancet Neurology* **18**, 459-480 (2019).
- 572 2. Ettehad, D. *et al.* Blood pressure lowering for prevention of cardiovascular disease  
573 and death: a systematic review and meta-analysis. *The Lancet* **387**, 957-967 (2016).
- 574 3. Hankey, G.J. Stroke. *The Lancet* **389**, 641-654 (2017).
- 575 4. Santos, R. *et al.* A comprehensive map of molecular drug targets. *Nat Rev Drug*  
576 *Discov* **16**, 19-34 (2017).
- 577 5. Olszewski, A.J. & Szostak, W.B. Homocysteine content of plasma proteins in ischemic  
578 heart disease. *Atherosclerosis* **69**, 109-13 (1988).
- 579 6. Robins, S.J., Lyass, A., Brocchia, R.W., Massaro, J.M. & Vasan, R.S. Plasma lipid transfer  
580 proteins and cardiovascular disease. The Framingham Heart Study. *Atherosclerosis*  
581 **228**, 230-6 (2013).
- 582 7. Goetzl, E.J. *et al.* Altered lysosomal proteins in neural-derived plasma exosomes in  
583 preclinical Alzheimer disease. *Neurology* **85**, 40-7 (2015).
- 584 8. Feldreich, T. *et al.* Circulating proteins as predictors of cardiovascular mortality in  
585 end-stage renal disease. *Journal of nephrology* **32**, 111-119 (2019).
- 586 9. Hauser, A.S. *et al.* Pharmacogenomics of GPCR Drug Targets. *Cell* **172**, 41-54 e19  
587 (2018).
- 588 10. Ursu, O., Glick, M. & Oprea, T. Novel drug targets in 2018. *Nat Rev Drug Discov*  
589 (2019).
- 590 11. Sun, B.B. *et al.* Genomic atlas of the human plasma proteome. *Nature* **558**, 73-79  
591 (2018).
- 592 12. Yao, C. *et al.* Genome-wide mapping of plasma protein QTLs identifies putatively  
593 causal genes and pathways for cardiovascular disease. *Nat Commun* **9**, 3268 (2018).
- 594 13. Emilsson, V. *et al.* Co-regulatory networks of human serum proteins link genetics to  
595 disease. *Science* **361**, 769-773 (2018).
- 596 14. Smith, G.D. Mendelian randomization for strengthening causal inference in  
597 observational studies: application to gene-environment interactions. *Perspectives*  
598 *on Psychological Science* **5**, 527-545 (2010).
- 599 15. Davey Smith, G. & Hemani, G. Mendelian randomization: genetic anchors for causal  
600 inference in epidemiological studies. *Human molecular genetics* **23**, R89-R98 (2014).
- 601 16. Di Angelantonio, E. *et al.* Efficiency and safety of varying the frequency of whole  
602 blood donation (INTERVAL): a randomised trial of 45 000 donors. *The Lancet* **390**,  
603 2360-2371 (2017).
- 604 17. Malik, R. *et al.* Multi-ancestry genome-wide association study of 520,000 subjects  
605 identifies 32 loci associated with stroke and stroke subtypes. *Nat Genet* **50**, 524-537  
606 (2018).
- 607 18. Denny, J.C. *et al.* Systematic comparison of phenome-wide association study of  
608 electronic medical record data and genome-wide association study data. *Nat*  
609 *Biotechnol* **31**, 1102-10 (2013).
- 610 19. Assarsson, E. *et al.* Homogenous 96-plex PEA immunoassay exhibiting high sensitivity,  
611 specificity, and excellent scalability. *PLoS one* **9**, e95192 (2014).
- 612 20. Durbin, R. Efficient haplotype matching and storage using the positional Burrows-  
613 Wheeler transform (PBWT). *Bioinformatics* **30**, 1266-1272 (2014).

- 614 21. Astle, W.J. *et al.* The allelic landscape of human blood cell trait variation and links to  
615 common complex disease. *Cell* **167**, 1415-1429. e19 (2016).
- 616 22. Marchini, J., Howie, B., Myers, S., McVean, G. & Donnelly, P. A new multipoint  
617 method for genome-wide association studies by imputation of genotypes. *Nature*  
618 *Genetics* **39**, 906-913 (2007).
- 619 23. Chang, C.C. *et al.* Second-generation PLINK: rising to the challenge of larger and  
620 richer datasets. *Gigascience* **4**, 7 (2015).
- 621 24. Pierce, B.L., Ahsan, H. & Vanderweele, T.J. Power and instrument strength  
622 requirements for Mendelian randomization studies using multiple genetic variants.  
623 *Int J Epidemiol* **40**, 740-52 (2011).
- 624 25. Palmer, T.M. *et al.* Using multiple genetic variants as instrumental variables for  
625 modifiable risk factors. *Statistical Methods in Medical Research* **21**, 223-242 (2012).
- 626 26. Benner, C. *et al.* FINEMAP: efficient variable selection using summary data from  
627 genome-wide association studies. *Bioinformatics* **32**, 1493-1501 (2016).
- 628 27. Surendran, P. *et al.* Discovery of rare variants associated with blood pressure  
629 regulation through meta-analysis of 1.3 million individuals. *Nature Genetics* (2020).
- 630 28. Nielsen, J.B. *et al.* Biobank-driven genomic discovery yields new insight into atrial  
631 fibrillation biology. *Nat Genet* **50**, 1234-1239 (2018).
- 632 29. Mahajan, A. *et al.* Fine-mapping type 2 diabetes loci to single-variant resolution using  
633 high-density imputation and islet-specific epigenome maps. *Nat Genet* **50**, 1505-  
634 1513 (2018).
- 635 30. Persyn, E. *et al.* Genome-wide association study of MRI markers of cerebral small  
636 vessel disease in 42,310 participants. *Nature Communications* **11**, 2175 (2020).
- 637 31. Pulit, S.L. *et al.* Meta-analysis of genome-wide association studies for body fat  
638 distribution in 694 649 individuals of European ancestry. *Hum Mol Genet* **28**, 166-174  
639 (2019).
- 640 32. Liu, M. *et al.* Association studies of up to 1.2 million individuals yield new insights  
641 into the genetic etiology of tobacco and alcohol use. *Nat Genet* **51**, 237-244 (2019).
- 642 33. Zhou, W. *et al.* Efficiently controlling for case-control imbalance and sample  
643 relatedness in large-scale genetic association studies. *Nat Genet* **50**, 1335-1341  
644 (2018).
- 645 34. Burgess, S., Butterworth, A. & Thompson, S.G. Mendelian Randomization Analysis  
646 With Multiple Genetic Variants Using Summarized Data. *Genetic Epidemiology* **37**,  
647 658-665 (2013).
- 648 35. Yavorska, O.O. & Burgess, S. MendelianRandomization: an R package for performing  
649 Mendelian randomization analyses using summarized data. *International Journal of*  
650 *Epidemiology* **46**, 1734-1739 (2017).
- 651 36. Hemani, G. *et al.* The MR-Base platform supports systematic causal inference across  
652 the human phenome. *Elife* **7**(2018).
- 653 37. Lawlor, D.A. Commentary: Two-sample Mendelian randomization: opportunities and  
654 challenges. *International journal of epidemiology* **45**, 908 (2016).
- 655 38. Bowden, J., Smith, G.D. & Burgess, S. Mendelian randomization with invalid  
656 instruments: effect estimation and bias detection through Egger regression.  
657 *International Journal of Epidemiology* **44**, 512-525 (2015).
- 658 39. Verbanck, M., Chen, C.-y., Neale, B. & Do, R. Detection of widespread horizontal  
659 pleiotropy in causal relationships inferred from Mendelian randomization between  
660 complex traits and diseases. *Nature genetics* **50**, 693-698 (2018).

- 661 40. Burgess, S., Foley, C.N., Allara, E., Staley, J.R. & Howson, J.M.M. A robust and  
662 efficient method for Mendelian randomization with hundreds of genetic variants.  
663 *Nature Communications* **11**, 376 (2020).
- 664 41. Foley, C.N. *et al.* A fast and efficient colocalization algorithm for identifying shared  
665 genetic risk factors across multiple traits. *Nat Commun* **12**, 764 (2021).
- 666 42. Giambartolomei, C. *et al.* Bayesian test for colocalisation between pairs of genetic  
667 association studies using summary statistics. *PLoS Genet* **10**, e1004383 (2014).
- 668 43. Zheng, J. *et al.* Phenome-wide Mendelian randomization mapping the influence of  
669 the plasma proteome on complex diseases. *Nat Genet* **52**, 1122-1131 (2020).
- 670 44. Ferreira, R.C. *et al.* Functional IL6R 358Ala Allele Impairs Classical IL-6 Receptor  
671 Signaling and Influences Risk of Diverse Inflammatory Diseases. *PLOS Genetics* **9**,  
672 e1003444 (2013).
- 673 45. Williams, F.M. *et al.* Ischemic stroke is associated with the ABO locus: the EuroCLOT  
674 study. *Ann Neurol* **73**, 16-31 (2013).
- 675 46. Chong, M. *et al.* Novel Drug Targets for Ischemic Stroke Identified Through  
676 Mendelian Randomization Analysis of the Blood Proteome. *Circulation* (2019).
- 677 47. Hodgson, J. *et al.* Characterization of GDF2 Mutations and Levels of BMP9 and  
678 BMP10 in Pulmonary Arterial Hypertension. *Am J Respir Crit Care Med* **201**, 575-585  
679 (2020).
- 680 48. Wolf, P.A., Abbott, R.D. & Kannel, W.B. Atrial fibrillation as an independent risk  
681 factor for stroke: the Framingham Study. *Stroke* **22**, 983-988 (1991).
- 682 49. Yang, X.-M. *et al.* Atrial fibrillation known before or detected after stroke share  
683 similar risk of ischemic stroke recurrence and death. *Stroke* **50**, 1124-1129 (2019).
- 684 50. Lawes, C.M., Bennett, D.A., Feigin, V.L. & Rodgers, A. Blood pressure and stroke: an  
685 overview of published reviews. *Stroke* **35**, 776-785 (2004).
- 686 51. Kannel, W.B., Wolf, P.A., Verter, J. & McNamara, P.M. Epidemiologic assessment of  
687 the role of blood pressure in stroke: the Framingham study. *Jama* **276**, 1269-1278  
688 (1996).
- 689 52. Mäntylä, R. *et al.* Magnetic resonance imaging white matter hyperintensities and  
690 mechanism of ischemic stroke. *Stroke* **30**, 2053-2058 (1999).
- 691 53. Mitchell, A.B. *et al.* Obesity Increases Risk of Ischemic Stroke in Young Adults. *Stroke*  
692 **46**, 1690-1692 (2015).
- 693 54. Kivimäki, M. *et al.* Overweight, obesity, and risk of cardiometabolic multimorbidity:  
694 pooled analysis of individual-level data for 120 813 adults from 16 cohort studies  
695 from the USA and Europe. *The Lancet Public Health* **2**, e277-e285 (2017).
- 696 55. Janghorbani, M. *et al.* Prospective Study of Type 1 and Type 2 Diabetes and Risk of  
697 Stroke Subtypes. *The Nurses' Health Study* **30**, 1730-1735 (2007).
- 698 56. Rost, N.S. *et al.* White matter hyperintensity volume is increased in small vessel  
699 stroke subtypes. *Neurology* **75**, 1670-1677 (2010).
- 700 57. Broze Jr, G.J. Tissue factor pathway inhibitor. *Thrombosis and haemostasis* **73**, 090-  
701 093 (1995).
- 702 58. He, M. *et al.* Observation on tissue factor pathway and some other coagulation  
703 parameters during the onset of acute cerebrocardiac thrombotic diseases.  
704 *Thrombosis research* **107**, 223-228 (2002).
- 705 59. Hoke, M. *et al.* Tissue factor pathway inhibitor and the risk of recurrent venous  
706 thromboembolism. *Thrombosis and haemostasis* **94**, 787-790 (2005).

- 707 60. Waters, E.K. *et al.* Aptamer ARC19499 mediates a procoagulant hemostatic effect by  
708 inhibiting tissue factor pathway inhibitor. *Blood* **117**, 5514-5522 (2011).
- 709 61. Westrick, R.J. *et al.* Deficiency of tissue factor pathway inhibitor promotes  
710 atherosclerosis and thrombosis in mice. *Circulation* **103**, 3044-3046 (2001).
- 711 62. Bugge, T.H., Antalis, T.M. & Wu, Q. Type II transmembrane serine proteases. *J Biol*  
712 *Chem* **284**, 23177-81 (2009).
- 713 63. Knappe, S., Wu, F., Masikat, M.R., Morser, J. & Wu, Q. Functional analysis of the  
714 transmembrane domain and activation cleavage of human corin design and  
715 characterization of a soluble corin. *Journal of Biological Chemistry* **278**, 52363-52370  
716 (2003).
- 717 64. Yamaguchi, N., Okui, A., Yamada, T., Nakazato, H. & Mitsui, S. Spinesin/TMPRSS5, a  
718 novel transmembrane serine protease, cloned from human spinal cord. *J Biol Chem*  
719 **277**, 6806-12 (2002).
- 720 65. Guipponi, M. *et al.* An integrated genetic and functional analysis of the role of type II  
721 transmembrane serine proteases (TMPRSSs) in hearing loss. *Hum Mutat* **29**, 130-41  
722 (2008).
- 723 66. Carrasco, E. *et al.* Human CD6 Down-Modulation following T-Cell Activation  
724 Compromises Lymphocyte Survival and Proliferative Responses. *Front Immunol* **8**,  
725 769 (2017).
- 726 67. Hernández, P., Moreno, E., Aira, L.E. & Rodríguez, P.C. Therapeutic Targeting of CD6  
727 in Autoimmune Diseases: A Review of Cuban Clinical Studies with the Antibodies  
728 IOR-T1 and Itolizumab. *Curr Drug Targets* **17**, 666-77 (2016).
- 729 68. Zimmerman, A.W. *et al.* Long-term engagement of CD6 and ALCAM is essential for T-  
730 cell proliferation induced by dendritic cells. *Blood* **107**, 3212-3220 (2006).
- 731 69. Gimferrer, I. *et al.* Relevance of CD6-Mediated Interactions in T Cell Activation and  
732 Proliferation. *The Journal of Immunology* **173**, 2262-2270 (2004).
- 733 70. Smedbakken, L. *et al.* Activated Leukocyte Cell Adhesion Molecule and Prognosis in  
734 Acute Ischemic Stroke. *Stroke* **42**, 2453-2458 (2011).
- 735 71. Jin, R., Yang, G. & Li, G. Inflammatory mechanisms in ischemic stroke: role of  
736 inflammatory cells. *J Leukoc Biol* **87**, 779-89 (2010).
- 737 72. Elkind, M.S. Inflammatory mechanisms of stroke. *Stroke* **41**, S3-8 (2010).
- 738 73. Georgakis, M.K. *et al.* Genetically determined levels of circulating cytokines and risk  
739 of stroke: role of monocyte chemoattractant protein-1. *Circulation* **139**, 256-268  
740 (2019).
- 741 74. Swerdlow, D.I. *et al.* The interleukin-6 receptor as a target for prevention of coronary  
742 heart disease: a mendelian randomisation analysis. *Lancet* **379**, 1214-24 (2012).
- 743 75. Schnabel, R.B. *et al.* Large-scale candidate gene analysis in whites and African  
744 Americans identifies IL6R polymorphism in relation to atrial fibrillation: the National  
745 Heart, Lung, and Blood Institute's Candidate Gene Association Resource (CARE)  
746 project. *Circulation: Cardiovascular Genetics* **4**, 557-564 (2011).
- 747 76. Eyre, S. *et al.* High-density genetic mapping identifies new susceptibility loci for  
748 rheumatoid arthritis. *Nature genetics* **44**, 1336-1340 (2012).
- 749 77. Ueland, T. *et al.* Serum PCSK9 is modified by interleukin-6 receptor antagonism in  
750 patients with hypercholesterolaemia following non-ST-elevation myocardial  
751 infarction. *Open heart* **5**, e000765 (2018).
- 752 78. Plump, A. & Davey Smith, G. Identifying and Validating New Drug Targets for Stroke  
753 and Beyond: Can Mendelian Randomization Help? (Am Heart Assoc, 2019).

754 79. Szabo, R. *et al.* Type II transmembrane serine proteases. *Thromb Haemost* **90**, 185-  
755 93 (2003).  
756

757

758 **Figures (in separate file)**

759 **Figure 1.** Overview of MR analyses.

760 **Figure 2.** Venn diagram of identified potential causal proteins for stroke subtypes.

761 **Figure 3.** Effects of six potential causal proteins on stroke subtypes.

762 **Figure 4.** Causal effects of risk factors on stroke subtypes.

763 **Figure 5.** Effect sizes (Z-score) of six potential causal proteins on stroke subtypes and causal risk  
764 factors for stroke.

765 **Figure 6.** Forest plots illustrating the potential on-target side-effects associated with causal proteins  
766 revealed by Phe-MR analysis for TFPI (A) and TMPRSS5 (B).

767

768

769 **Tables (in separate file)**

770 **Table 1.** Data sources for the Mendelian Randomization analysis in current study.

771 **Table 2.** Summary of significant proteins (biomarkers) representing potential causal factors for stroke  
772 and subtypes.

773 **Table 3.** Stroke risk factors are potential mediators of stroke associated proteins and stroke.

774

775 **Supplementary Figures (in separate file)**

776

777 **Supplementary Tables (in separate file)**

778

## Figures

**Figure 1.** Overview of MR analyses.

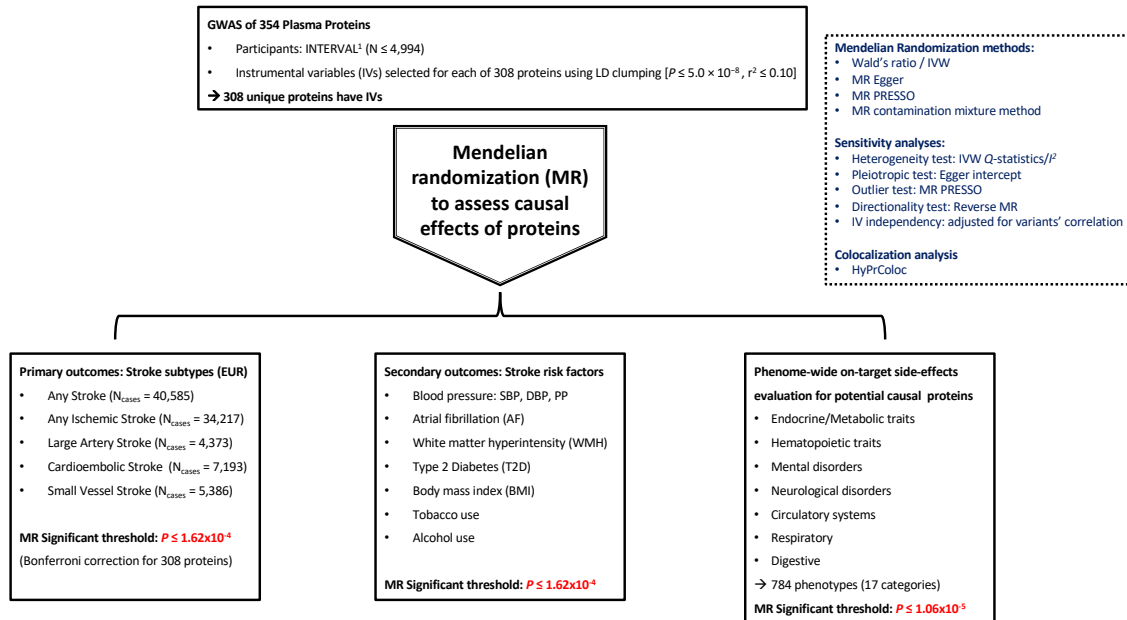

Four O-link panels were used to measure plasma proteins in a subset of ~5000 samples from the INTERVAL study<sup>16</sup>. Genetic variants associated with plasma protein levels were identified based on results from their corresponding GWAS. These genetic variants were then used as proxies for the protein level and tested their relationship with stroke was tested used data from the MEGASTROKE consortium<sup>17</sup> for stroke outcomes (Primary MR), with conventional stroke risk factors (Secondary MR), and with 784 phenotypes (Phe-MR) in UK Biobank to test a broad spectrum of potential effects of hypothetical therapeutic agents for stroke.

**Figure 2.** Venn diagram of identified potential causal proteins for stroke subtypes.

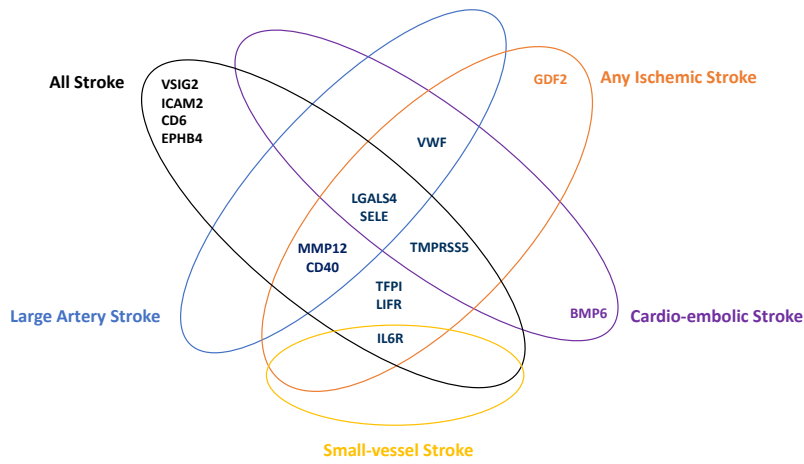



**Figure 3.** Effects of six potential causal proteins on stroke subtypes.

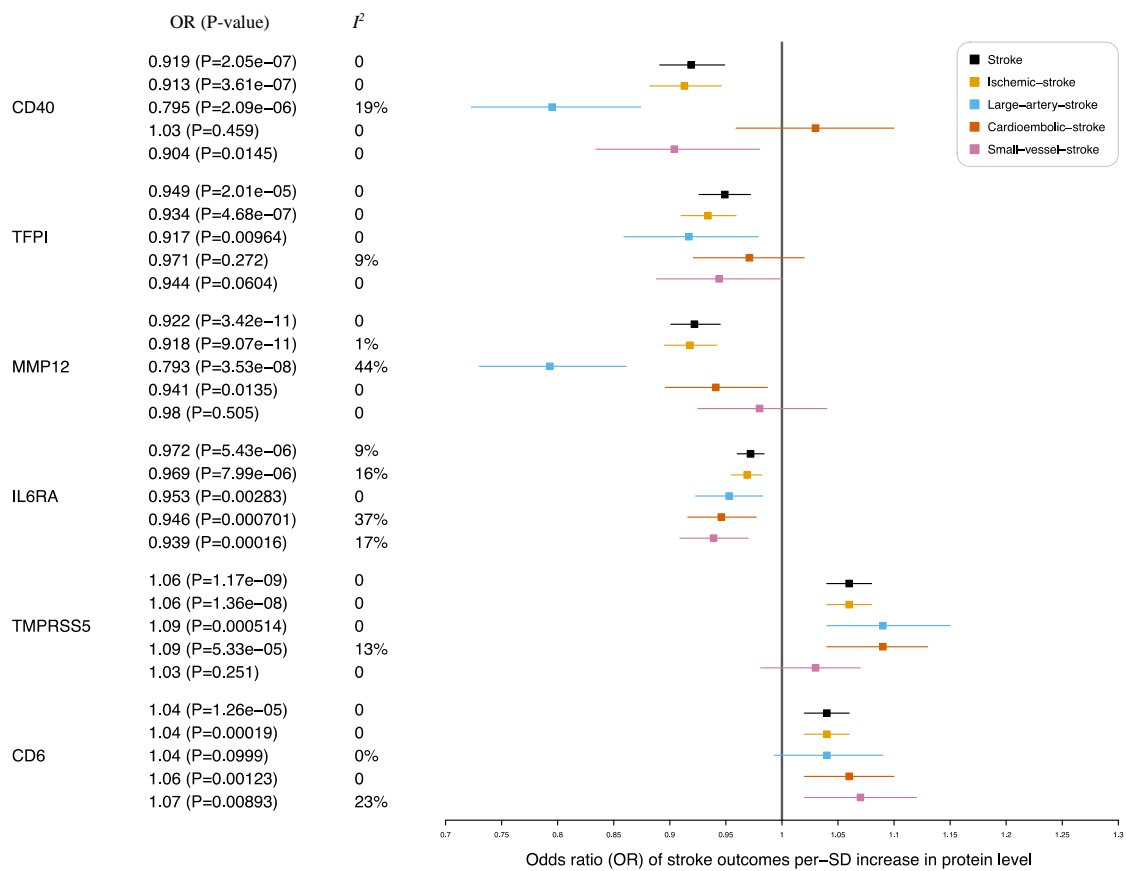

OR: Odds ratio;  $I^2$ : heterogeneity. CD40: B Cell Surface Antigen CD40; TFPI: Tissue Factor

Pathway Inhibitor; MMP12: Matrix Metalloproteinase 12; IL6RA: Interleukin 6 Receptor Subunit

Alpha; TMPRSS5: Transmembrane Serine Protease 5; CD6: T-Cell Differentiation Antigen CD6.

**Figure 4.** Causal effects of risk factors on stroke subtypes.

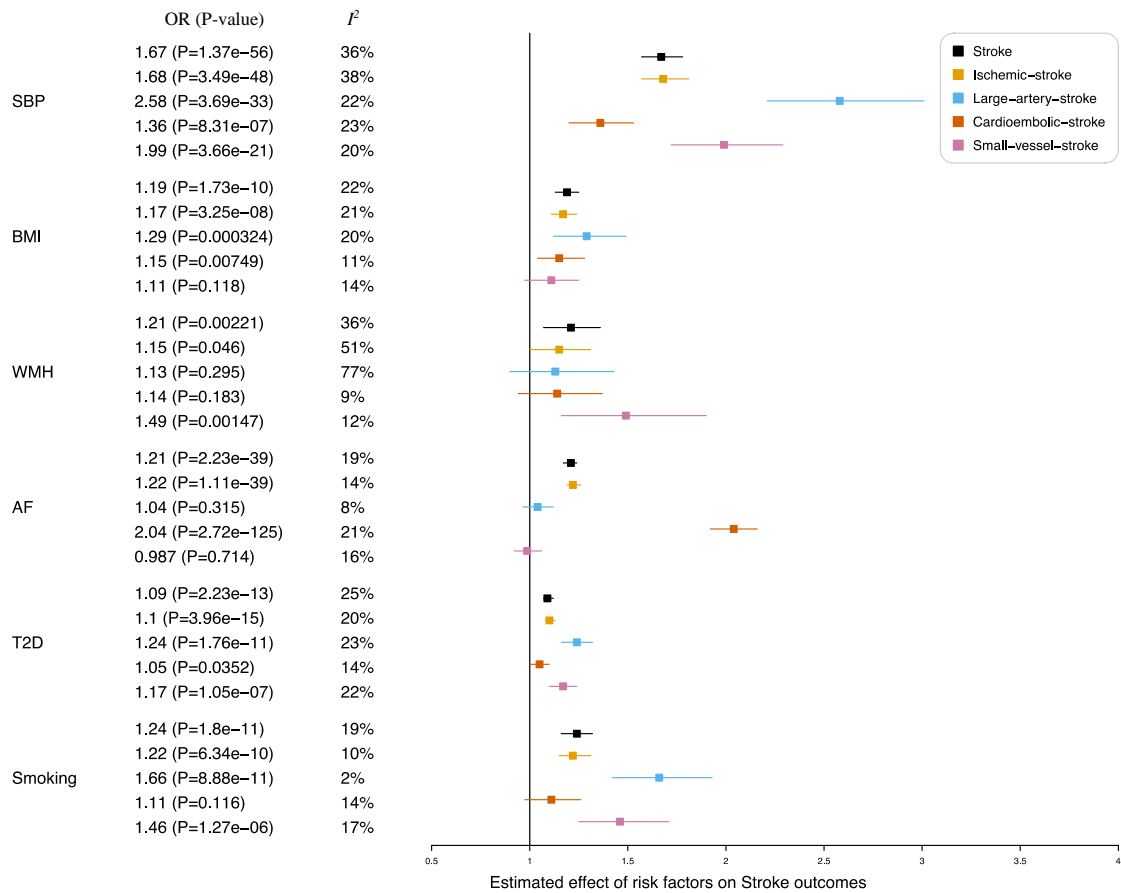

$I^2$ : heterogeneity. SBP = Systolic Blood Pressure; AF = Atrial Fibrillation; WMH = White Matter Hyperintensity; T2D = Type 2 Diabetes; BMI = Body Mass Index; Smoking = Smoking Initiation.

**Figure 5.** Effect sizes (Z-score) of six potential causal proteins on stroke subtypes and causal risk factors for stroke.

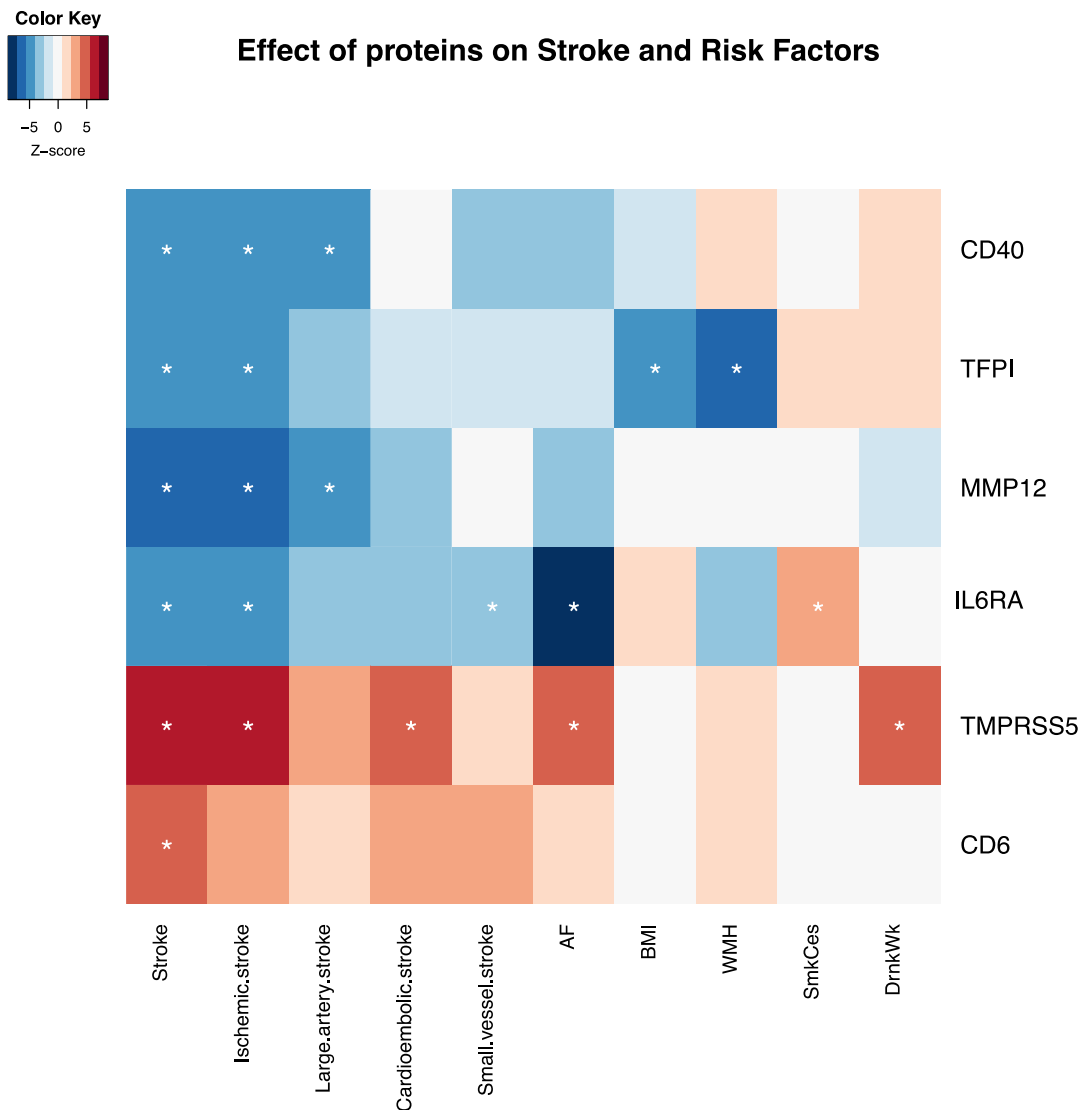

Colours in each lattice of the heatmap represent the effect size (Z-score), with genetically predicted increased protein level associated with higher risk of outcomes coloured in brown and lower risk of outcomes coloured in blue. The darker the colour the larger the effect size.

\* indicates that the causal association is significant, which passed Bonferroni correction of

$P_{causalEstimate\_IVW} \leq 0.05/308 = 1.61 \times 10^{-4}$  and passed sensitivity tests with  $P_{Qstat} \geq 0.05$  and  $P_{EggerIntercept} \geq 0.05$ .

**Figure 6.** Forest plots illustrating the potential on-target side-effects associated with causal proteins

revealed by Phe-MR analysis for TFPI (A) and TMPRSS5 (B).

**A.**

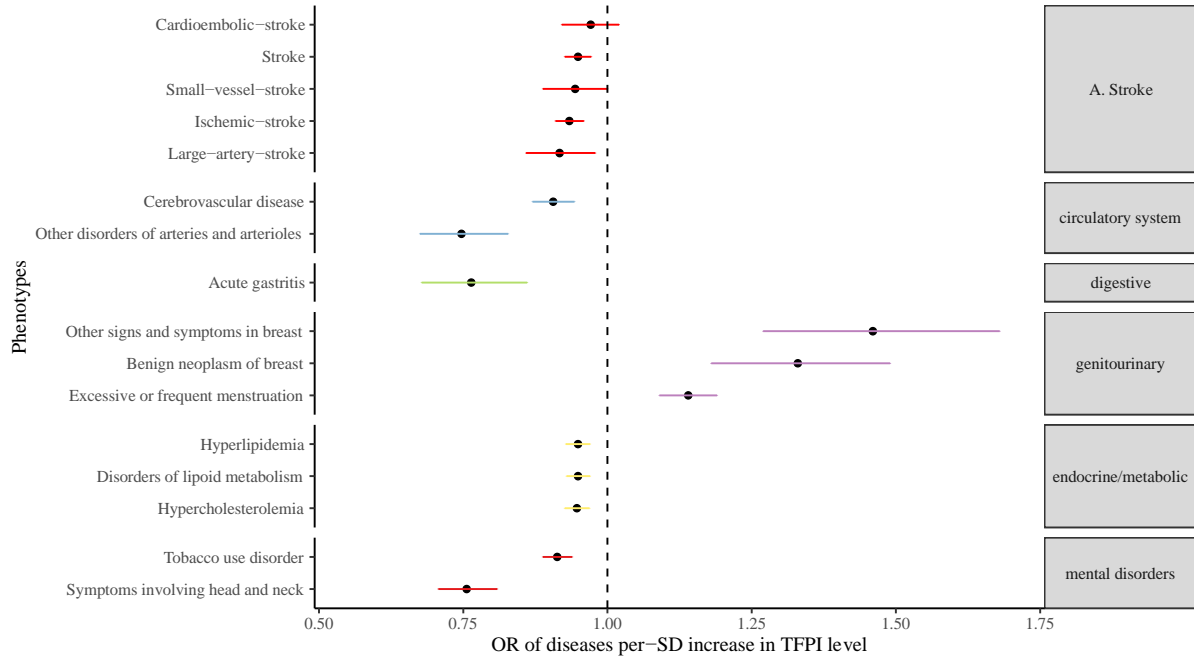

**B.**

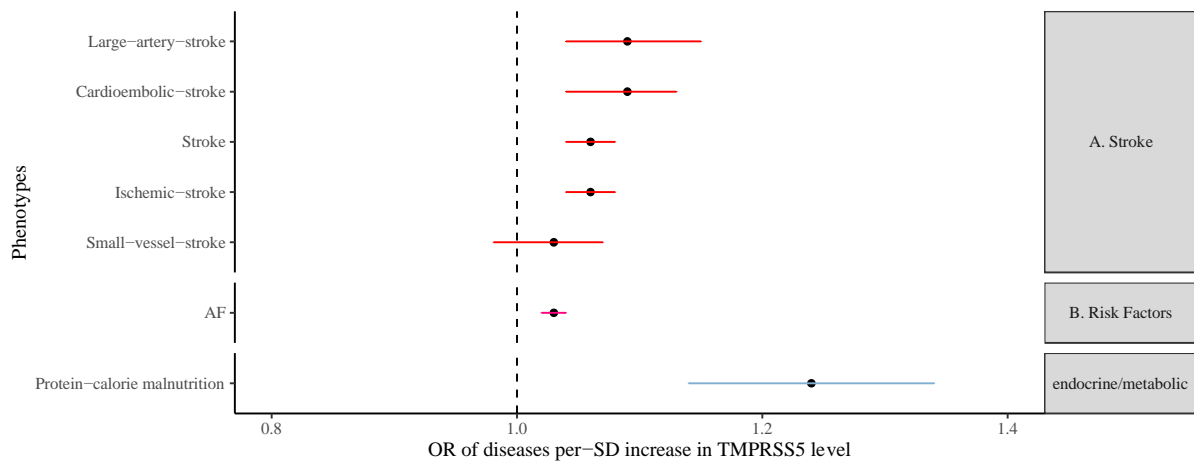

In general, results can be perceived as the effects of per SD higher circulating protein level on each phenotype. If the effect direction of the target protein on the phenotype is consistent with that on stroke outcomes, it represents “beneficial” additional indications through intervention of circulating protein level. Conversely, opposing effect directions of the target protein on the phenotype and stroke represents “deleterious” side-effects. For example, a higher level of TFPI is associated with lower

medRxiv preprint doi: <https://doi.org/10.1101/2021.10.22.21265375>; this version posted October 25, 2021. The copyright holder for this preprint (which was not certified by peer review) is the author/funder, who has granted medRxiv a license to display the preprint in perpetuity. It is made available under a [CC-BY-NC-ND 4.0 International license](#).

risk of ischemic stroke and so phenotypes with  $OR < 1$  represents “beneficial effects”,  $OR > 1$  represents “deleterious effects” when the hypothetical intervention increases TFPI levels. Only significant

associations that passed Bonferroni correction ( $P \leq 0.05/6/784 = 1.06 \times 10^{-5}$ ) were plotted. See

**Supplementary Table 9** for more clinical information of the ICD code phenotypes.

**Table 1. Data sources for the Mendelian Randomization analysis for current study.**

| <b>Phenotype</b>                         | <b>Source</b>                                                                      | <b>N (Total or Cases/Controls)</b> | <b>Imputation reference panel</b> | <b>Ancestry</b>               |
|------------------------------------------|------------------------------------------------------------------------------------|------------------------------------|-----------------------------------|-------------------------------|
| <b>Olink protein levels</b>              | INTERVAL study (unpublished data)                                                  | 4,994                              | 1000 Genomes Phase 3 +<br>UK10K   | European                      |
| Inflammation Panel (INF1)                |                                                                                    |                                    |                                   |                               |
| Cardiovascular Panels (CVD2/CVD3)        |                                                                                    |                                    |                                   |                               |
| Neurology Panel (NEURO)                  |                                                                                    |                                    |                                   |                               |
| <b>Primary Outcomes</b>                  |                                                                                    |                                    |                                   |                               |
| Any stroke                               | 17 studies (Malik et al) <sup>17</sup>                                             | 40,585/406,111                     | 1000 Genomes Phase 1              | European                      |
| Ischemic stroke                          |                                                                                    | 34,217/406,111                     |                                   |                               |
| Large artery stroke                      |                                                                                    | 4,373/406,111                      |                                   |                               |
| Cardio-embolic stroke                    |                                                                                    | 7,193/406,111                      |                                   |                               |
| Small vessel stroke                      |                                                                                    | 5,386/406,111                      |                                   |                               |
| <b>Secondary Outcomes</b>                |                                                                                    |                                    |                                   |                               |
| Atrial fibrillation (AF)                 | 6 Studies (Nielsen, et al) <sup>28</sup>                                           | 60,620/970,216                     | HRC*                              | European                      |
| Type 2 Diabetes (T2D)                    | 32 Studies (Mahajan, et al) <sup>29</sup>                                          | 74,124/824,006                     | HRC                               | European                      |
| Body Mass Index (BMI)                    | GIANT + UK Biobank (Pulit, et al) <sup>31</sup>                                    | 694,649                            | HRC                               | European                      |
| Tobacco and alcohol use                  | 29 Studies (Liu, et al) <sup>32</sup>                                              |                                    | HRC                               | European                      |
| AgeSmk                                   |                                                                                    | 341,427                            |                                   |                               |
| CigDay                                   |                                                                                    | 337,334                            |                                   |                               |
| SmkCes                                   |                                                                                    | 547,219                            |                                   |                               |
| SmkInit                                  |                                                                                    | 1,232,091                          |                                   |                               |
| DrnkWk                                   |                                                                                    | 941,280                            |                                   |                               |
| Blood pressure (BP)                      | UK Biobank (Surendran, et al.) <sup>27</sup>                                       | 445,415                            | HRC                               | European                      |
| Systolic BP                              |                                                                                    |                                    |                                   |                               |
| Diastolic BP                             |                                                                                    |                                    |                                   |                               |
| Pulse pressure (PP)                      |                                                                                    |                                    |                                   |                               |
| White Matter Hyperintensity (WMH)        | UK Biobank + CHARGE + study in stroke patients (Persyn et al., 2020) <sup>30</sup> | 42,310                             | HRC                               | Trans-ethnic, mainly European |
| <b>On-target side effects evaluation</b> |                                                                                    |                                    |                                   |                               |
| 784 Phenotypes                           | UK Biobank (Zhou, et al) <sup>33</sup>                                             | 408,961                            | HRC                               | European                      |

\*HRC: The Haplotype Reference Consortium (HRC); AgeSmk: Age of Initiation of Regular Smoking; CigDay: Cigarettes per day; SmkCes: Smoking Cessation; SmkInit: Smoking Initiation; DrnkWk: Drinks per week.

**Table 2. Proteins representing potential causal factors for stroke and subtypes.**

| <b>Protein</b> | <b>N SNPs</b> | <b>Outcome</b>       | <b>OR [95%CI]<sup>#</sup></b> | <b>P value</b>         |
|----------------|---------------|----------------------|-------------------------------|------------------------|
| TFPI           | 21            | Stroke               | 0.949[0.926, 0.972]           | $2.01 \times 10^{-5}$  |
|                | 21            | Ischemic-stroke      | 0.934[0.91, 0.959]            | $4.68 \times 10^{-7}$  |
| TMPRSS5        | 20            | Stroke               | 1.058[1.039, 1.077]           | $1.17 \times 10^{-9}$  |
|                | 20            | Ischemic-stroke      | 1.059[1.038, 1.08]            | $1.36 \times 10^{-8}$  |
|                | 20            | Cardioembolic-stroke | 1.089[1.045, 1.134]           | $5.33 \times 10^{-5}$  |
| CD40           | 10            | Stroke               | 0.919[0.891, 0.949]           | $2.05 \times 10^{-7}$  |
|                | 10            | Ischemic-stroke      | 0.913[0.882, 0.946]           | $3.61 \times 10^{-7}$  |
|                | 10            | Large-artery-stroke  | 0.795[0.723, 0.874]           | $2.09 \times 10^{-6}$  |
| CD6            | 23            | Stroke               | 1.039[1.021, 1.057]           | $1.26 \times 10^{-5}$  |
| IL6RA          | 39            | Stroke               | 0.972[0.96, 0.984]            | $5.43 \times 10^{-6}$  |
|                | 39            | Ischemic-stroke      | 0.969[0.955, 0.982]           | $7.99 \times 10^{-6}$  |
|                | 39            | Small-vessel-stroke  | 0.939[0.909, 0.97]            | $1.60 \times 10^{-4}$  |
| MMP12          | 13            | Stroke               | 0.922[0.901, 0.945]           | $3.42 \times 10^{-11}$ |
|                | 13            | Ischemic-stroke      | 0.918[0.895, 0.942]           | $9.07 \times 10^{-11}$ |
|                | 12            | Large-artery-stroke  | 0.793[0.73, 0.861]            | $3.53 \times 10^{-8}$  |

<sup>#</sup>OR [95%CI]=Odds ratio and its 95% confidence interval per 1-SD higher genetically-predicted plasma protein level

**Table 3.**

**a. MR results of risk factors and stroke outcomes.**

| <b>Risk Factors</b> | <b>Stroke outcome</b> | <b>N SNPs</b> | <b>OR [95%CI] *</b> | <b>P-value</b>          |
|---------------------|-----------------------|---------------|---------------------|-------------------------|
| AF                  | Stroke                | 130           | 1.21[1.18, 1.24]    | 2.23×10 <sup>-39</sup>  |
|                     | Ischemic-stroke       | 130           | 1.22[1.19, 1.26]    | 1.11×10 <sup>-39</sup>  |
|                     | Large-artery-stroke   | 131           | 1.04[0.97, 1.12]    | 0.315                   |
|                     | Cardioembolic-stroke  | 133           | 2.04[1.92, 2.16]    | 2.72×10 <sup>-125</sup> |
|                     | Small-vessel-stroke   | 131           | 0.99[0.92, 1.06]    | 0.714                   |
| BMI                 | Stroke                | 792           | 1.19[1.13, 1.25]    | 1.73×10 <sup>-10</sup>  |
|                     | Ischemic-stroke       | 791           | 1.17[1.11, 1.24]    | 3.25×10 <sup>-08</sup>  |
|                     | Large-artery-stroke   | 794           | 1.29[1.12, 1.49]    | 3.24×10 <sup>-04</sup>  |
|                     | Cardioembolic-stroke  | 792           | 1.15[1.04, 1.28]    | 7.49×10 <sup>-03</sup>  |
|                     | Small-vessel-stroke   | 794           | 1.11[0.98, 1.25]    | 0.118                   |
| SBP                 | Stroke                | 701           | 1.67[1.57, 1.78]    | 1.37×10 <sup>-56</sup>  |
|                     | Ischemic-stroke       | 704           | 1.68[1.57, 1.81]    | 3.49×10 <sup>-48</sup>  |
|                     | Large-artery-stroke   | 710           | 2.58[2.21, 3.01]    | 3.69×10 <sup>-33</sup>  |
|                     | Cardioembolic-stroke  | 705           | 1.36[1.2, 1.53]     | 8.31×10 <sup>-07</sup>  |
|                     | Small-vessel-stroke   | 708           | 1.99[1.72, 2.29]    | 3.66×10 <sup>-21</sup>  |
| DBP                 | Stroke                | 661           | 1.5[1.4, 1.6]       | 1.04×10 <sup>-32</sup>  |
|                     | Ischemic-stroke       | 667           | 1.5[1.4, 1.62]      | 1.67×10 <sup>-28</sup>  |
|                     | Large-artery-stroke   | 674           | 1.72[1.46, 2.02]    | 5.01×10 <sup>-11</sup>  |
|                     | Cardioembolic-stroke  | 673           | 1.26[1.12, 1.43]    | 2.11×10 <sup>-04</sup>  |
|                     | Small-vessel-stroke   | 677           | 1.8[1.54, 2.1]      | 6.30×10 <sup>-14</sup>  |
| PP                  | Stroke                | 723           | 1.4[1.31, 1.49]     | 1.07×10 <sup>-25</sup>  |
|                     | Ischemic-stroke       | 723           | 1.41[1.33, 1.51]    | 1.82×10 <sup>-25</sup>  |
|                     | Large-artery-stroke   | 725           | 2.23[1.92, 2.59]    | 3.29×10 <sup>-26</sup>  |
|                     | Cardioembolic-stroke  | 726           | 1.19[1.06, 1.33]    | 3.21×10 <sup>-03</sup>  |
|                     | Small-vessel-stroke   | 725           | 1.53[1.34, 1.75]    | 4.17×10 <sup>-10</sup>  |
| T2D                 | Stroke                | 340           | 1.09[1.07, 1.12]    | 2.23×10 <sup>-13</sup>  |
|                     | Ischemic-stroke       | 341           | 1.1[1.08, 1.13]     | 3.96×10 <sup>-15</sup>  |
|                     | Large-artery-stroke   | 341           | 1.24[1.16, 1.32]    | 1.76×10 <sup>-11</sup>  |
|                     | Cardioembolic-stroke  | 337           | 1.05[1, 1.1]        | 0.0352                  |
|                     | Small-vessel-stroke   | 342           | 1.17[1.1, 1.24]     | 1.05×10 <sup>-07</sup>  |
| WMH                 | Stroke                | 16            | 1.21[1.07, 1.36]    | 2.21×10 <sup>-03</sup>  |
|                     | Ischemic-stroke       | 17            | 1.15[1, 1.31]       | 0.046                   |
|                     | Large-artery-stroke   | 18            | 1.13[0.9, 1.43]     | 0.295                   |
|                     | Cardioembolic-stroke  | 18            | 1.14[0.94, 1.37]    | 0.183                   |
|                     | Small-vessel-stroke   | 15            | 1.49[1.17, 1.9]     | 1.47×10 <sup>-03</sup>  |
| SmkInit             | Stroke                | 365           | 1.24[1.16, 1.32]    | 1.80×10 <sup>-11</sup>  |
|                     | Ischemic-stroke       | 364           | 1.22[1.15, 1.31]    | 6.34×10 <sup>-10</sup>  |
|                     | Large-artery-stroke   | 365           | 1.66[1.42, 1.93]    | 8.88×10 <sup>-11</sup>  |
|                     | Cardioembolic-stroke  | 365           | 1.11[0.98, 1.25]    | 0.116                   |
|                     | Small-vessel-stroke   | 365           | 1.46[1.25, 1.71]    | 1.27×10 <sup>-06</sup>  |



**b. MR results of stroke associated proteins and risk factors.**

| Protein | N SNPs | Risk Factors | OR/ $\beta$ [95%CI] #  | P value                |
|---------|--------|--------------|------------------------|------------------------|
| TFPI    | 19     | BMI          | -0.013[-0.019, -0.007] | $3.56 \times 10^{-5}$  |
|         | 19     | WMH          | -0.06[-0.08, -0.04]    | $7.15 \times 10^{-10}$ |
| TMPRSS5 | 21     | AF           | 1.03[1.016, 1.045]     | $2.15 \times 10^{-5}$  |
| IL6RA   | 46     | AF           | 0.959[0.95, 0.968]     | $2.55 \times 10^{-18}$ |

#OR/  $\beta$  [95%CI]: Odds ratio/log(odds ratio) and its 95% confidence interval, indicates pe-1-SD increase in protein level and its effect on each outcome, if the outcome is a continuous trait, *e.g.* BMI, BP, we report the effect using  $\beta$ , otherwise, we use OR (for binary outcome). OR=Odds Ratio; CI=Confidence Interval; AF=Atrial Fibrillation; BMI=Body Mass Index; WMH=White Matter Hyperintensity; T2D=Type 2 Diabetes; SBP=Systolic Blood Pressure; DBP=Diastolic Blood Pressure; PP=Pulse Pressure; SmkInit=Smoking Initiation.
